# Supplementary material for: Can atmospheric chemistry deposition schemes reliably simulate stomatal ozone flux across global land covers and climates?
Source: Copernicus journal article supplement (doi:10.5194/egusphere-2025-429), 2025-02-14
Supplement: Supplementary file 1 [file egusphere-2025-429-supplement.pdf]

*Supplement of*

**Can atmospheric chemistry deposition schemes reliably simulate stomatal ozone flux across global land covers and climates?**

5

## S1. Total dry deposition velocity calculation

The total dry deposition velocity of O<sub>3</sub> ( $v_d$ ) is calculated by the standard formula including the aerodynamic resistance ( $R_a$ ), quasi-laminar boundary layer resistance ( $R_b$ ), and surface resistance ( $R_c$ ).

$$v_d = \frac{1}{(R_a + R_b + R_c)} \quad (1)$$

The formula for  $R_a$  and  $R_b$  are essentially the same among different models that follow earlier literature (e.g., Padro, 1996; Wesely et al., 2002).  $R_c$  is calculated as follows.

$$R_c = \frac{1}{\left(\frac{1}{R_s + R_m} + \frac{1}{R_{ext}} + \frac{1}{R_{inc} + R_{soil}}\right)} \quad (2)$$

Where  $R_s$ ,  $R_m$ ,  $R_{ext}$ ,  $R_{inc}$ , and  $R_{soil}$  are resistances due to stomata, mesophyll, cuticle, in-canopy (aerodynamic), and soil resistance to deposition.  $R_m = 0$  for O<sub>3</sub> in all models used in this study. Equations for  $R_{ext}$ ,  $R_{inc}$ , and  $R_{soil}$  can be found in the respective literature of each of the models. Equations for  $R_s$  is different for each model and are discussed in section S3.

20

## S2. Effective conductance calculation

The effective conductance of O<sub>3</sub> through a given pathway indicates the relative importance of the pathway to the total deposition (Clifton et al., 2023; Galmarini et al., 2021). There are three deposition branches for the models used in the current study, i.e., the effective conductance through ground ( $G_{ground,eff}$ ), Cuticle ( $G_{cut,eff}$ ), and Stomata ( $G_{st,eff}$ ), and their

25 formulae are as follows.

$$G_{ground,eff} = \frac{\frac{1}{R_{inc} + R_{soil}}}{\frac{1}{R_s} + \frac{1}{R_{ext}} + \frac{1}{R_{inc} + R_{soil}}} * V_d \quad (3)$$

$$G_{cut,eff} = \frac{\frac{1}{R_{ext}}}{\frac{1}{R_s} + \frac{1}{R_{ext}} + \frac{1}{R_{inc} + R_{soil}}} * V_d \quad (4)$$

30

$$G_{st,eff} = \frac{\frac{1}{R_s}}{\frac{1}{R_s} + \frac{1}{R_{ext}} + \frac{1}{R_{inc} + R_{soil}}} * V_d \quad (5)$$

35 Where  $R_s$ ,  $R_{ext}$ ,  $R_{inc}$ , and  $R_{soil}$  are resistances due to stomata, cuticle, in-canopy aerodynamic resistance, and soil  
resistance to deposition.  $V_d$  is the deposition velocity of O<sub>3</sub>.

### S3. Stomatal Ozone Flux ( $F_{st}$ ) calculation using the Stomatal resistance ( $R_s$ )

The canopy level stomatal ozone flux ( $F_{st}$ ) was calculated from the canopy level total stomatal resistance by the following  
40 equation:

$$F_{st} = \frac{C_0}{R_s + R_m} \quad (6)$$

Where,  $C_0$  is the ozone concentration at the top of the canopy. As the O<sub>3</sub> concentrations at the top of the canopy are typically  
45 not available and the O<sub>3</sub> measurement heights across our study sites were mostly below 10 m (Table 1),  $C_0$  were assumed to  
be the same as the O<sub>3</sub> concentrations above the canopy and such assumptions are very reasonable (Zhang et al., 2006).  $R_s$  and  
 $R_m$  are the stomatal and mesophyll resistance, respectively; the latter of which is assumed to be 0 for O<sub>3</sub>. Calculations of  $R_s$   
are described in the following sections.

#### 50 S3.1. $R_s$ calculation by the Zhang et al. (2003) model

The stomatal resistance ( $R_s$ ) calculation by Zhang et al. (2003) uses the Jarvis-style approach, where the  $R_s$  is calculated from  
minimum stomatal resistance (maximum stomatal conductance) and a series of empirical functions as stress functions. The  
equation for  $R_s$ :

$$55 \quad R_s = 1 / [G_s(PAR)f(T)f(D)f(\psi) \times D_i/D_v] \quad (7)$$

where  $G_s(PAR)$  is the unstressed leaf stomatal conductance, which is a function of photosynthetically active radiation ( $PAR$ ).  
The dimensionless stress functions  $f(T)$ ,  $f(D)$ , and  $f(\psi)$  represent the conductance-reducing effects of air temperature  $T$ , water  
vapour pressure deficit  $D$ , and water stress (leaf water potential)  $\psi$ , respectively, on leaf stomatal conductance.  $D_v$  and  $D_i$  are  
the molecular diffusivities for water vapour and ozone, respectively. The sunlit/shade stomatal conductance model (two-big  
60 leaf model) is used for calculating  $G_s(PAR)$ :

$$G_s(PAR) = \frac{L_{sun}}{r_s(PAR_{sun})} + \frac{L_{shade}}{r_s(PAR_{shade})} \quad (8)$$

$$r_s(PAR) = r_{s,min}(1 + b_{rs}/PAR) \quad (9)$$

65

where  $L_{sun}$  and  $L_{shade}$  are the total sunlit and shaded leaf area indexes, respectively.  $r_s$  is the unstressed leaf stomatal resistance calculated for  $PAR_{sun}$  and  $PAR_{shade}$  ( $PAR$  received by sunlit and shaded leaves, respectively).  $r_{s,min}$  is the minimum leaf stomatal resistance and  $b_{rs}$  is an empirical constant. Details of the calculations of these parameters as well as those for  $f(T)$ ,  $f(D)$ , and  $f(\psi)$  can be found in Zhang et al. (2002).

70

### S3.2. $R_s$ calculation in the Noah-GEM model

The Noah-GEM model uses the semi-empirical Ball-Berry type approach where the stomatal resistance is calculated from the plant photosynthesis rates (Niyogi et al., 2009; Wu et al., 2011):

$$R_s = 1/[LAI(mA_n h_s P / C_s + b)] \quad (10)$$

75 Where  $LAI$ ,  $A_n$ ,  $h_s$ ,  $P$ ,  $C_s$  are leaf area index, net photosynthesis rate, relative humidity at leaf surface, atmospheric pressure, and  $CO_2$  partial pressure at the leaf surface, respectively.  $m$  and  $b$  are linear coefficients obtained through gas exchange experiments. The Noah-GEM model for  $R_s$  calculation requires several submodels for calculating the  $A_n$  and are described in  
80 Wu et al. (2011) and Niyogi et al. (2009).

### S3.3. $R_s$ calculation in the CMAQ model

The CMAQ model has the options of both Jarvis-style and Ball-Berry type approaches to calculate the stomatal resistance. Current study used both approaches of the model. In the Jarvis-style approach, the canopy is treated as a single leaf (one-big  
85 leaf model) and the stomatal resistance is calculated as follows (Pleim and Ran, 2011; Pleim and Xiu, 2003; Xiu and Pleim, 2001):

$$R_s = r_{s,min} LAI / (f_{PAR} f_T f_{vpd} f_w) \quad (11)$$

90 Where  $r_{s,min}$  is the minimum stomatal resistance (maximum conductance of a leaf under unstressed conditions), which is specified according to the vegetation type (Xiu and Pleim, 2001). LAI is the leaf area index of the canopy.  $f_{PAR}$ ,  $f_T$ ,  $f_{vpd}$ , and  $f_w$  are the dimensionless stress functions, which represent the fractions of stomatal closure (0 to 1) associated with the photosynthetically active radiation PAR, air temperature in the canopy, relative humidity at the leaf surface, and root-depth soil moisture, respectively. Equations of the four stress functions are given in Xiu and Pleim (2001).

95

Ran et al. (2017) implemented the Ball-Berry type stomatal resistance calculations in the CMAQ model:

$$R_s = 1/(m_g A_{net} e_s P_a / C_s e_i + g_0) \quad (12)$$

100 Where  $A_{net}$  is the net photosynthesis rate,  $C_s$  is the CO<sub>2</sub> partial pressure at leaf surface,  $e_s$  is the water vapor partial pressures at leaf surface,  $e_i$  is the saturation vapor pressure inside the leaf, and  $P_a$  is the atmospheric pressure.  $g_0$  is set to 0.01 mol/m<sup>2</sup>s<sup>-1</sup> for C<sub>3</sub> plants and 0.04 mol/m<sup>2</sup>s<sup>-1</sup> for C<sub>4</sub> plants,  $m_g$  is a plant-type parameter which is 9 for C<sub>3</sub> plants and 4 for C<sub>4</sub> plants. Detailed discussion on  $A_{net}$  calculations can be found in Ran et al. (2017).

### S3.4. $R_s$ calculation in the TEMIR model

105 The Terrestrial Ecosystem Model in R (TEMIR) (Sun et al., 2022; Tai et al., 2023) has two Jarvis-style stomatal conductance schemes adopted from the Wesley scheme (Wesely, 1989) and the Zhang et al. (2003) scheme, as well as two photosynthesis-based schemes: Farquhar–Ball–Berry (Ball et al., 1987; Farquhar et al., 1980) and Medlyn (Medlyn et al., 2011) schemes. In the current study, the FBB scheme was used. The equation for the stomatal resistance is as follows:

110

$$R_s = 1/\left[\left(\frac{L_{sun}}{r_b + r_{sun}} + \frac{L_{shade}}{r_b + r_{shade}}\right)\frac{D_i}{D_v}\right] \quad (13)$$

Where  $L_{sun}$  and  $L_{shade}$  are the sunlit and shaded LAI respectively,  $r_b$  is the leaf boundary resistance,  $r_{sun}$  and  $r_{shade}$  are the leaf level sunlit and shaded stomatal resistances for water vapor, respectively, and  $D_v$  and  $D_i$  are the molecular diffusivities for water vapour and ozone, respectively.  $r_{sun}$  and  $r_{shade}$  in the FBB scheme are calculated from the stomatal conductance ( $g_s$ )

115 according to the following equation.

$$r_s = 1/g_s = 1/\left[\alpha\left(\frac{mA_n\left(\frac{e_s}{e_{sat}}\right)}{\left(\frac{C_s}{P_{atm}}\right)} + b\right)\right] \quad (14)$$

Where  $\alpha$  is the unit conversion factor ( $\mu\text{mol H}_2\text{O m}^{-2} \text{s}^{-1}$  to  $\text{m s}^{-1}$ ) that is dependent on atmospheric temperature and pressure,  $m$  and  $b$  are linear coefficients, which are dependent on the plant types, and the values are given in Oleson et al. (2013),  $A_n$  is the photosynthesis rate calculated separately for sunlit and shaded leaves.  $C_s$  is the  $\text{CO}_2$  partial pressure at leaf surface,  $P_{atm}$  is the atmospheric pressure  $e_s$  is the water vapor partial pressure at the leaf surface, and  $e_{sat}$  is the saturation vapor pressure inside the leaf.

### S3.5. $R_s$ calculation in the ECHAM-MESSy model

The ECHAM-MESSy model uses Jarvis-style approach for the stomatal resistance calculations (Emmerichs et al., 2021) and the formula is very similar to that in Zhang et al. (2003):

$$R_s = [r_s(PAR, LAI)/f_T f_{vpd} f_w] \times D_v/D_i \quad (15)$$

$$r_s(PAR, LAI) = \frac{kc}{\left[\frac{b}{d PAR} \ln\left(\frac{d \exp(kLAI) + 1}{d + 1}\right) - \ln\left(\frac{d \exp(-kLAI)}{d + 1}\right)\right]} \quad (16)$$

130

Where  $r_s(PAR, LAI)$  is the optimal stomatal resistance which depends on the photosynthetically active radiation (PAR) and the leaf area index (LAI).  $f_T$ ,  $f_{vpd}$ , and  $f_w$  are the dimensionless stress functions associated with air temperature in the canopy, relative humidity at the leaf surface, and root-depth soil moisture, respectively.  $D_v$  and  $D_i$  are the molecular diffusivities of water vapour and ozone, respectively.  $k$  is the extinction coefficient ( $= 0.9$ ),  $c$  is the minimum stomatal resistance ( $= 100 \text{ sm}^{-1}$ ), and  $a = 5000 \text{ J m}^{-3}$ ,  $b = 10 \text{ W m}^{-2}$  and  $d = \frac{a+bc}{c PAR}$  are fitting parameters. Stress function equations are given in Emmerichs et al. (2021).

135

### S3.6. $R_s$ calculation in the DO3SE model

The DO3SE model calculates the  $R_s$  from the by stomatal conductance that is obtained by the following formulas (Emberson et al., 2000):

140

$$R_s = r_s/LAI \quad (17)$$

$$r_s = g_{max} \max\{(f_{min}, f_{temp}, f_{VPD}, f_{SWC})\} \times f_{phen} \times f_{light} \quad (18)$$

145

Where LAI is the leaf area index,  $g_{max}$  is the maximum stomatal conductance (prescribed) that is modified by several stress functions to account for the conductance change by the variations of leaf/needle age over the growing period ( $f_{phen}$ ), solar radiation ( $f_{light}$ ), temperature ( $f_{temp}$ ), vapor pressure deposit ( $f_{VPD}$ ), and soil water ( $f_{SWC}$ ).  $f_{min}$  is the minimum daytime stomatal conductance under field conditions (expressed as the fraction of  $g_{max}$ )

150

## References

- Ball, J.T., Woodrow, I.E., Berry, J.A., 1987. A Model Predicting Stomatal Conductance and its Contribution to the Control of Photosynthesis under Different Environmental Conditions, in: Biggins, J. (Ed.), Progress in Photosynthesis Research: Volume 4 Proceedings of the VIIth International Congress on Photosynthesis Providence, Rhode Island, USA, August 10–15, 1986. Springer Netherlands, Dordrecht, pp. 221–224. [https://doi.org/10.1007/978-94-017-0519-6\\_48](https://doi.org/10.1007/978-94-017-0519-6_48)
- 155 Clifton, O.E., Schwede, D., Hogrefe, C., Bash, J.O., Bland, S., Cheung, P., Coyle, M., Emberson, L., Flemming, J., Fredj, E., Galmarini, S., Ganzeveld, L., Gazetas, O., Goded, I., Holmes, C.D., Horváth, L., Huijnen, V., Li, Q., Makar, P.A., Mammarella, I., Manca, G., Munger, J.W., Pérez-Camanyo, J.L., Pleim, J., Ran, L., San Jose, R., Silva, S.J., Staebler, R., Sun, S., Tai, A.P.K., Tas, E., Vesala, T., Weidinger, T., Wu, Z., Zhang, L., 2023. A single-point modeling approach for the intercomparison and evaluation of ozone dry deposition across chemical transport models (Activity 2 of AQMEII4). Atmospheric Chemistry and Physics 23, 9911–9961. <https://doi.org/10.5194/acp-23-9911-2023>
- 160 Emberson, L.D., Ashmore, M.R., Cambridge, H.M., Simpson, D., Tuovinen, J.-P., 2000. Modelling stomatal ozone flux across Europe. Environmental Pollution 109, 403–413. [https://doi.org/10.1016/S0269-7491\(00\)00043-9](https://doi.org/10.1016/S0269-7491(00)00043-9)
- 165 Emmerichs, T., Kerkweg, A., Ouwersloot, H., Fares, S., Mammarella, I., Taraborrelli, D., 2021. A revised dry deposition scheme for land–atmosphere exchange of trace gases in ECHAM/MESSy v2.54. Geoscientific Model Development 14, 495–519. <https://doi.org/10.5194/gmd-14-495-2021>
- Farquhar, G.D., von Caemmerer, S., Berry, J.A., 1980. A biochemical model of photosynthetic CO<sub>2</sub> assimilation in leaves of C<sub>3</sub> species. Planta 149, 78–90. <https://doi.org/10.1007/BF00386231>
- 170 Galmarini, S., Makar, P., Clifton, O.E., Hogrefe, C., Bash, J.O., Bellasio, R., Bianconi, R., Bieser, J., Butler, T., Ducker, J., Flemming, J., Hodzic, A., Holmes, C.D., Kioutsioukis, I., Kranenburg, R., Lupascu, A., Perez-Camanyo, J.L., Pleim, J., Ryu, Y.-H., San Jose, R., Schwede, D., Silva, S., Wolke, R., 2021. Technical note: AQMEII4 Activity 1: evaluation of wet and dry deposition schemes as an integral part of regional-scale air quality models. Atmospheric Chemistry and Physics 21, 15663–15697. <https://doi.org/10.5194/acp-21-15663-2021>
- 175 Medlyn, B.E., Duursma, R.A., Eamus, D., Ellsworth, D.S., Prentice, I.C., Barton, C.V.M., Crous, K.Y., De Angelis, P., Freeman, M., Wingate, L., 2011. Reconciling the optimal and empirical approaches to modelling stomatal conductance. Global Change Biology 17, 2134–2144. <https://doi.org/10.1111/j.1365-2486.2010.02375.x>
- Niyogi, D., Alapaty, K., Raman, S., Chen, F., 2009. Development and Evaluation of a Coupled Photosynthesis-Based Gas Exchange Evapotranspiration Model (GEM) for Mesoscale Weather Forecasting Applications. Journal of Applied Meteorology and Climatology 48, 349–368. <https://doi.org/10.1175/2008JAMC1662.1>
- 180 Oleson, K., Lawrence, M., Bonan, B., Drewniak, B., Huang, M., Koven, D., Levis, S., Li, F., Riley, J., Subin, M., Swenson, S., Thornton, E., Bozbiyik, A., Fisher, R., Heald, L., Kluzek, E., Lamarque, J.-F., Lawrence, J., Leung, R., Lipscomb, W., Muszala, P., Ricciuto, M., Sacks, J., Sun, Y., Tang, J., Yang, Z.-L., 2013. Technical description of version 4.5 of the Community Land Model (CLM). <https://doi.org/10.5065/D6RR1W7M>
- 185 Padro, J., 1996. Summary of ozone dry deposition velocity measurements and model estimates over vineyard, cotton, grass and deciduous forest in summer. Atmospheric Environment, Fourth International Conference on Atmospheric Science and Applications to Air Quality 30, 2363–2369. [https://doi.org/10.1016/1352-2310\(95\)00352-5](https://doi.org/10.1016/1352-2310(95)00352-5)
- Pleim, J., Ran, L., 2011. Surface Flux Modeling for Air Quality Applications. Atmosphere 2, 271–302. <https://doi.org/10.3390/atmos2030271>
- 190 Pleim, J.E., Xiu, A., 2003. Development of a Land Surface Model. Part II: Data Assimilation. Journal of Applied Meteorology and Climatology 42, 1811–1822. [https://doi.org/10.1175/1520-0450\(2003\)042<1811:DOALSM>2.0.CO;2](https://doi.org/10.1175/1520-0450(2003)042<1811:DOALSM>2.0.CO;2)

- Ran, L., Pleim, J., Song, C., Band, L., Walker, J.T., Binkowski, F.S., 2017. A photosynthesis-based two-leaf canopy stomatal conductance model for meteorology and air quality modeling with WRF/CMAQ PX LSM. *Journal of Geophysical Research: Atmospheres* 122, 1930–1952. <https://doi.org/10.1002/2016JD025583>
- 195 Sun, S., Tai, A.P.K., Yung, D.H.Y., Wong, A.Y.H., Ducker, J.A., Holmes, C.D., 2022. Influence of plant ecophysiology on ozone dry deposition: comparing between multiplicative and photosynthesis-based dry deposition schemes and their responses to rising CO<sub>2</sub> level. *Biogeosciences* 19, 1753–1776. <https://doi.org/10.5194/bg-19-1753-2022>
- Tai, A.P.K., Yung, D.H.Y., Lam, T., 2023. Terrestrial Ecosystem Model in R (TEMIR) version 1.0: Simulating ecophysiological responses of vegetation to atmospheric chemical and meteorological changes. *EGUsphere* 1–46. <https://doi.org/10.5194/egusphere-2023-1287>
- 200 Wesely, M.L., 1989. Parameterization of surface resistances to gaseous dry deposition in regional-scale numerical models. *Atmospheric Environment* (1967) 23, 1293–1304. [https://doi.org/10.1016/0004-6981\(89\)90153-4](https://doi.org/10.1016/0004-6981(89)90153-4)
- Wesely, M.L., Doskey, P.V., Shannon, J.D., 2002. Deposition parameterizations for the Industrial Source Complex (ISC3) model (No. ANL/ER/TR-01/003; W-31-109-Eng-38). Argonne National Lab. (ANL), Argonne, IL (United States). <https://doi.org/10.2172/1260839>
- 205 Wu, Z., Wang, X., Chen, F., Turnipseed, A.A., Guenther, A.B., Niyogi, D., Charusombat, U., Xia, B., William Munger, J., Alapaty, K., 2011. Evaluating the calculated dry deposition velocities of reactive nitrogen oxides and ozone from two community models over a temperate deciduous forest. *Atmospheric Environment* 45, 2663–2674. <https://doi.org/10.1016/j.atmosenv.2011.02.063>
- Xiu, A., Pleim, J.E., 2001. Development of a Land Surface Model. Part I: Application in a Mesoscale Meteorological Model. *Journal of Applied Meteorology and Climatology* 40, 192–209. [https://doi.org/10.1175/1520-0450\(2001\)040<0192:DOALSM>2.0.CO;2](https://doi.org/10.1175/1520-0450(2001)040<0192:DOALSM>2.0.CO;2)
- 210 Zhang, L., Brook, J.R., Vet, R., 2003. A revised parameterization for gaseous dry deposition in air-quality models. *Atmospheric Chemistry and Physics* 3, 2067–2082. <https://doi.org/10.5194/acp-3-2067-2003>
- Zhang, L., Moran, M.D., Makar, P.A., Brook, J.R., Gong, S., 2002. Modelling gaseous dry deposition in AURAMS: a unified regional air-quality modelling system. *Atmospheric Environment, Seventh International Conference on Atmospheric Science and Applications to Air Quality (ASAAQ)* 36, 537–560. [https://doi.org/10.1016/S1352-2310\(01\)00447-2](https://doi.org/10.1016/S1352-2310(01)00447-2)
- 215 Zhang, L., Vet, R., Brook, J.R., Legge, A.H., 2006. Factors affecting stomatal uptake of ozone by different canopies and a comparison between dose and exposure. *Science of The Total Environment* 370, 117–132. <https://doi.org/10.1016/j.scitotenv.2006.06.004>
