# Supplementary material for: Can atmospheric chemistry deposition schemes reliably simulate stomatal ozone flux across global land covers and climates?
Source: Copernicus journal article supplement (doi:10.5194/egusphere-2025-429), 2025-02-14
Supplement: Supplementary file [file egusphere-2025-429-AC1-supplement.pdf]

# Point-by-point reply

## Reviewer 1

Dear Authors,

The manuscript “Can atmospheric chemistry deposition schemes reliably simulate stomatal ozone flux across global land covers and climates?” presents a thorough and well-structured analysis of ozone deposition and its implications for vegetation. The study is not only scientifically rigorous, but also highly relevant to understanding how different empirical and semi-empirical modeling approaches influence the assessment of air pollution effects. The analysis is very interesting and well-structured and the combination with a clear exposition of key findings, such as variability in stomatal and non-stomatal deposition and the impact of meteorological factors on O<sub>3</sub> uptake, makes this paper a valuable contribution to the field.

The authors have done an excellent job of detailing the methodology, providing transparency in comparing the models. Furthermore, the manuscript effectively highlights the strengths and limitations of different modeling approaches; for example how the models incorporate detailed land cover parameters while others rely only on more generalized assumptions, influencing deposition estimates. This nuanced perspective enhances its scientific relevance. The discussion is well structured and the results are presented in a way that facilitates interpretation, making this study a significant reference for future research on air pollution and its environmental impacts. So I suggest only a minor revision just to make the whole paper clearer and more fluent.

We gratefully acknowledge the reviewer’s positive feedback and have addressed individual comments carefully. You will find our answers highlighted in blue and changes in red below.

### **Abstract**

The abstract is dense and difficult to read, probably due to an excessive amount of condensed information. To improve clarity, it would be useful to simplify the sentences, reducing their length and complexity, and to reorganize the content in a more linear way. A clearer structure, which clearly distinguishes the context, objectives, methods, main results, and implications of the study, would help the reader to grasp the essential message more easily. Furthermore, eliminating secondary details would make the text more fluid and immediate, without compromising the completeness of the information.

We strongly agree with the reviewer and follow the suggestions to improve the readability. We change the abstract to the following:

„Over the past few decades, ozone risk assessments for vegetation have evolved two methods based on stomatal O<sub>3</sub> flux. However, substantial uncertainties remain in accurately simulating these fluxes. Here, we investigate stomatal O<sub>3</sub> fluxes across various land cover types worldwide simulated by six established deposition models. Hourly O<sub>3</sub> concentration and meteorological data at nine sites were extracted from the Tropospheric Ozone Assessment Report database, a comprehensive global collection of measurements, for the model simulations. The models estimated reasonable O<sub>3</sub> deposition (0.5 - 0.8 cm s<sup>-1</sup> in summer) which is mostly in agreement with the literature. Simulations of canopy conductance showed differences of models that varied by land cover type with correlation coefficients of 0.75, 0.80 and 0.85 for forests, crops and grasslands among the models. Differences between models were primarily influenced by soil moisture and vapor pressure deficit (VPD), depending on each model’s specific structure. Across models, the range of O<sub>3</sub> damage (POD<sub>y</sub>) simulations at each site was most consistent for crops (6 to 11 mmol O<sub>3</sub> m<sup>-2</sup>), followed by forests (3 to 19.5 mmol O<sub>3</sub> m<sup>-2</sup>) and grasslands (7 to 33 mmol O<sub>3</sub> m<sup>-2</sup>). The median estimate across models aligns well with the literature at the sites most vulnerable to O<sub>3</sub> damage. Overall, this study

represents a critical first step in developing and evaluating tools for broad-scale assessment of O<sub>3</sub> impacts on vegetation within the framework of TOAR phase II.“

## 1.Introduction

The introduction could be strengthened by discussing the broader implications of the differences between the models for real-world applications, particularly in the context of ecosystem management. And to give the reader a general understanding of whether using one model is preferable to another under certain conditions.

In lines 71- 81, we describe the commonly used models: ‘The common Jarvis-type models (e.g. Emberson et al., 2000; Ganzeveld et al., 1995; Zhang et al. 2003), widely applied due to their simplicity and computational efficiency, correct a prescribed maximum stomatal conductance with the multiplication of different environmental factors (e.g., temperature, light, soil water and atmospheric moisture). The A<sub>net</sub>-g<sub>s</sub> models couple g<sub>s</sub> to plant photosynthesis by calculating the net assimilation of CO<sub>2</sub> and estimating g<sub>s</sub> based on the resulting supply and demand of CO<sub>2</sub> (Farquhar et al., 1980; Goudriaan et al., 1985; Ball et al., 1987). A<sub>net</sub>-g<sub>s</sub> models involve multiple non-linear dependencies on soil water, humidity and temperature, among other factors defined by measurement constraints (Ball 1987; Leuning et al., 1997). Heterogeneity of stomatal deposition estimates over different land cover types is anticipated, but model uncertainty depends on the representation of the deposition mechanisms, model parameterisation and meteorological inputs (Hardacre et al., 2015; Clifton et al., 2020b; Huang et al., 2022; Khan et al., 2024).

According to the reviewer’s comment, we add here the following: ‘Broadly speaking, the pros and cons of these two modelling approaches will tend to depend on the aims of the risk assessment study, the extent of knowledge of the ecosystem being investigated and prevailing bio-climatic conditions. Jarvis-type models are arguably more suitable for studies where less is known about the eco-physiology of the ecosystem since they do not require simulation of net photosynthesis which in itself is inherently difficult to model accurately. However, these models still need to be calibrated for the particular bio-climate of study to ensure temperature and VPD functions are suitable for the prevailing conditions. By contrast, A<sub>net</sub>-g<sub>sto</sub> models may be more useful for studies where the physiological response to environmental conditions of the ecosystems is reasonably well understood as they can provide insight into not only pollutant deposition, but also how other environmental conditions in addition to pollution may limit plant growth and productivity more generally.

## 2. Methodology

The methods are mostly well described, but clarity on the consistency of input data across models (e.g., meteorological forcing, land cover) would improve transparency.

We add at the beginning (l. 99) the following:

“The web version of the DO3SE model is coupled to the TOAR database, i.e. the required input data (Table 3) is automatically provided by the database at the respective modelling sites.”

Line 116, we expanded the description as follows:

“To conduct offline simulations with models in addition to Web-DO3SE, the input data were extracted beforehand and proven for identity. The additionally required data (Table 3) were extracted from the TOAR database and the MeteoCloud server (<https://datapub.fz-juelich.de/slcs/meteocloud/index.html>) at Forschungszentrum Jülich.”

The role of non-stomatal deposition (cuticular, soil absorption) could be more explicitly detailed.

The manuscript is focused on stomatal deposition, because it is aimed to assess the vegetation impact. To be able to classify the contribution of the stomatal pathway with the total deposition at the individual sites we use the concept of effective conductances (including cuticular and soil deposition, SI equations 3-5). For the detailed calculations of cuticular deposition, we refer to the individual model descriptions. Most models only consider a general representation of soil deposition (no explicit calculation).

While the methodology is scientifically sound and well documented, the description of data selection criteria could be more explicit, especially regarding how site inclusion decisions affect the analysis. While the study acknowledges potential errors in the TOAR-II database, adding a small explanation would enrich the manuscript, especially regarding implications for the results.

The criteria (ensuring the selection of different plant functional types and land cover types which also had O<sub>3</sub> and meteorological data and ideally g<sub>st</sub> measurements) limited the site selection seriously. In the analysis, we interpret the results always with regard to the site-specific conditions. To further clarify that the site selection influence the interpretation of the results, we add to line 580 in the discussion:

[...with correlation coefficients of 0.75, 0.80 and 0.85 for forests, crops and grasslands]. “Thereby, the 9 sites selected for this study also reflect different climate conditions; however the selection of sites that provide such broad representations also means that the analysis and the results cannot be generalized. The global coverage, diverse land types and varying meteorological conditions of the 9 sites resulted in widespread model responses to soil moisture (Fig. 8), while appearing to be insensitive to changes of LAI (Fig. 9). The former underscored the idiosyncratic features and hence potential limitations of individual models, whereas the latter gave us confidence in model capabilities despite the different constructs and parameterizations of the models.”

The potential errors in the TOAR database are small and have been shown to have a minor impact (Schultz et al., 2017, Tarasick et al., 2018), which is described in lines 106-108. Therefore, we expect no significant impact on the model results. In line 611 to 614 (discussion section), we elaborated on uncertainties in estimating O<sub>3</sub> deposition in the original manuscript, and now add more information according to the reviewer’s comment: ‘For example, Travis et al. (2019) show that the midday O<sub>3</sub> concentration at 65 m above ground (mid-point of a first vertical layer of GEOS-Chem v9-02) is 3 ppb higher than the O<sub>3</sub> concentration at 10 m above ground (inferred by Monin-Obukhov Similarity Theory, MOST) over the Southeastern United States. A mismatch between O<sub>3</sub> measurement height and canopy height can lead to inaccurate POD<sub>y</sub> calculation (Gerosa et al, 2017). An O<sub>3</sub> bias of 2 ppb as estimated by e.g. Tarasick et al. (2018) would lead to a change of 6-7 % in POD1 (Gerosa et al., 2017). Similarly, we show [...]’

### 2.3 Stomatal deposition models and their key inputs

L 158-161: The explanation of the models is done in quite a bit of detail, but the reason why these models were chosen over others is not so clear, it could be explained better.

L 169: I don't understand why some model descriptions are more detailed than others. For example, the MESSy model approach is mentioned briefly compared to others. Standardizing the level of detail for each model would improve readability.

In the model description, we summarize the key features and the specialities of each model. To emphasize the model differences we modify the description to:

The **key model features** are described below.

- (1) The empirical/Jarvis-type models use a predefined stomatal conductance modified with different environmental stressors for radiation (PAR), air temperature (T), vapour pressure deficit (VPD) and soil water (SM) - The ZHANG model (Zhang et al., 2002; 2003; 2006) and the Web-DO<sub>3</sub>SE model (i.e., a version of DO<sub>3</sub>SE that is directly coupled to the TOAR database, Emberson et al. 2000) account for sunny and shaded leaves (two-big leaf), the Web-DO<sub>3</sub>SE model additionally depends on the vegetation phenology, the CMAQ\_J model (Pleim and Ran, 2011) and the MESSy model (Ganzeveld et al., 1995; Kerkweg et al., 2006) account for one-big leaf CMAQ\_J uses relative humidity (RH) instead of VPD. MESSy calculates the initial stomatal conductance based on the PAR and several empirical parameters
- (2) Semi-empirical/Ball-Berry - The CMAQ\_P model (Ran et al., 2017) and the TEMIR model (Collatz et al., 1991; Farquhar et al., 1980) calculate the stomatal conductance at sunlit and shaded leaves for C3 and C4 plants depending on net CO<sub>2</sub> assimilation rate, CO<sub>2</sub> partial pressure, atmospheric pressure (Pa) and water vapor pressure for each leaf. The NOAH-GEM model is different, calculating the stomatal conductance at one big leaf using RH instead of VPD (Wu et al., 2011; Niyogi et al., 2009).

L 178-181: The resistance pattern is not immediately clear; I suggest a modification to improve its clarity.

We suggest here below an improved scheme:

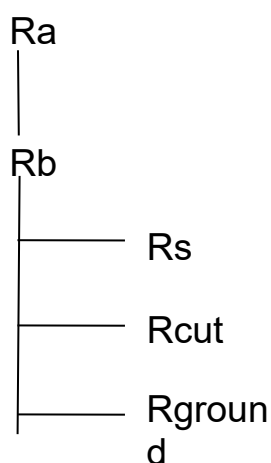

L 275-282: It is mentioned that factors such as wind speed and solar radiation influence O<sub>3</sub> deposition, but the explanation is not very clear and fluid. It might be useful to introduce a transition sentence to clearly highlight how each factor impacts the different components of deposition.

Yes we agree, and change line 274/275 to: ‘At the Amberd and Peru sites,  $G_{\text{cut}}$  and  $G_{\text{ground}}$  are low since low wind speed reduces downward mixing of ozone to the surface (atmospheric resistance).’  
 Line 278, we modify to: ‘In contrast, at the Mt Kenya site,  $G_{\text{st}}$  exceeds  $G_{\text{cut}}$  and  $G_{\text{ground}}$ , since the strong solar radiation (annual mean is  $246 \text{ W m}^{-2}$ , Table S2) at this site favours stomatal opening . Besides that, LAI is a very important governing factor for  $G_{\text{st}}$ . Therefore, it can be inferred that the O<sub>3</sub> deposition pathway depends on not only the land cover type but also meteorological drivers. The relative contributions of each deposition pathway depends on the interplay between these key factors at a particular site.’

### 3.2 Vegetation impact and variation with key input data

In this section, the terms PODy, POD1 and POD6 alternate without a clear transition between them, which could generate confusion in the reader. It would be useful to introduce a more structured analysis of the differences between these indicators. For example, specifying what their implications are in the different ecosystems analyzed. Furthermore, a more fluid connection between the various metrics would help to make the analysis clearer and easier to understand.

We thank the reviewer for this valuable suggestion and introduce a description of the different metrics in line 435: ‘The critical threshold for ozone damage  $y$  differs for the three land cover types. For forests and grass the  $y$  value is  $1 \text{ nmol O}_3 \text{ m}^{-2} \text{ s}^{-1}$  (POD1), O<sub>3</sub> damage to crops is assumed to occur only when the  $y$  threshold exceeds  $6 \text{ nmol O}_3 \text{ m}^{-2} \text{ s}^{-1}$  (POD6).’  
From there onwards, we change ‘PODy’ to the respective term POD1 or POD6.

### 4. Discussion and Conclusion

In this section the obtained results are clearly reported, only some passages between the topics (for example, from the discussion of the models to the division between leaves exposed to the sun and shaded) could be made more fluid with connecting sentences.

We change line 329/330 to: ‘Here, it is important to understand the model distinction between shaded and sunlit leaf ( $G_{\text{sun}}$ , Fig 4)’.

Furthermore, more emphasis could be given on practical implications: for example, the final section could be slightly expanded to underline the impact of the results.

We extend line 645 ff. as follows: ‘Overall, this study has demonstrated the widespread applicability and consensus among various numerical stomatal flux methods. Both semi-mechanistic as well as empirical models can generally represent observed ozone fluxes among different land cover types and climates. We identified the key model constructs and parameterisations that cause differences in ozone deposition and PODy estimates. However, none of the models clearly shows a superior overall performance. Instead, all models can be effectively applied, each with its own strengths and weaknesses. Our findings present exciting opportunities to extend applications beyond specific sites and growing seasons, enabling comprehensive global stomatal flux studies over longer periods.’
